# Supplementary material for: Pre-diagnosis neutrophil-to-lymphocyte ratio and mortality in individuals who develop lung cancer
Source: PubMed Central journal article supplement (PMC8492578; doi:10.1007/s10552-021-01469-3), 2021-07-08
Supplement: 10552_2021_1469_MOESM1_ESM.pdf [file 10552_2021_1469_MOESM1_ESM.pdf]

## Supplementary Tables

| <b>Supplementary Table 1. Summary of lung cancer cases (N=360) included in the present study by histotype.</b>                                                                             |                       |                      |                   |                 |
|--------------------------------------------------------------------------------------------------------------------------------------------------------------------------------------------|-----------------------|----------------------|-------------------|-----------------|
|                                                                                                                                                                                            | <b>Adenocarcinoma</b> | <b>Squamous cell</b> | <b>NSCLC, NOS</b> | <b>SCLC</b>     |
| Cases identified during active follow-up (1994 to 2005)                                                                                                                                    |                       |                      |                   |                 |
| Included in our risk analysis <sup>a</sup>                                                                                                                                                 | 135                   | 96                   | 9                 | 67 <sup>b</sup> |
| Unable to be matched to controls for our risk analysis <sup>a</sup>                                                                                                                        | 9                     | 12                   | 0                 | 9               |
| Cases with unknown histotype who were classified as a specific histotype post-2005                                                                                                         | 1                     | 6                    | 0                 | 4               |
| Case with SCLC histotype whose histotype was re-assigned post-2005                                                                                                                         | 0                     | 0                    | 1 <sup>b</sup>    | 0               |
| Cases ascertained during passive follow-up (2005 to 2013)                                                                                                                                  | 3                     | 1                    | 6                 | 1               |
| <b>Total in the present study</b>                                                                                                                                                          | <b>148</b>            | <b>115</b>           | <b>16</b>         | <b>81</b>       |
| Abbreviations: NSCLC, NOS = Non-Small Cell Lung Cancer, Not Otherwise Specified; SCLC = Small Cell Lung Cancer                                                                             |                       |                      |                   |                 |
| <sup>a</sup> Grieshaber, L., et al. (2018). "Methylation-derived Neutrophil-to-Lymphocyte Ratio and Lung Cancer Risk in Heavy Smokers." <i>Cancer Prevention Research</i> 11(11): 727-734. |                       |                      |                   |                 |
| <sup>b</sup> One SCLC case was re-classified as NSCLC, NOS for a total of 68 SCLC cases included in our risk analysis <sup>a</sup> .                                                       |                       |                      |                   |                 |

**Supplementary Table 2. mdNLR and mortality<sup>a</sup> for lung cancer cases by histotype, excluding those diagnosed within two years of blood draw.**

| mdNLR                                 | NSCLC                  |           |                   |                     |           |                   |                         |           |                   | SCLC                |           |                   |
|---------------------------------------|------------------------|-----------|-------------------|---------------------|-----------|-------------------|-------------------------|-----------|-------------------|---------------------|-----------|-------------------|
|                                       | All NSCLC <sup>a</sup> |           |                   | Adenocarcinoma      |           |                   | Squamous cell carcinoma |           |                   | Death<br>N          | Case<br>N | HR (95% CI)       |
|                                       | Death<br>N             | Case<br>N | HR (95% CI)       | Death<br>N          | Case<br>N | HR (95% CI)       | Death<br>N              | Case<br>N | HR (95% CI)       |                     |           |                   |
| <b>Lung cancer-specific mortality</b> |                        |           |                   |                     |           |                   |                         |           |                   |                     |           |                   |
| <b>Continuous</b>                     | 179                    | 225       | 0.96 (0.87, 1.07) | 86                  | 112       | 1.10 (0.89, 1.36) | 82                      | 99        | 0.92 (0.81, 1.05) | 59                  | 62        | 1.21 (0.96, 1.53) |
| <b>Q1</b> (lowest inflammation)       | 44                     | 58        | Ref               | 27                  | 38        | Ref               | 16                      | 18        | Ref               | 20                  | 20        | Ref               |
| <b>Q2</b>                             | 37                     | 51        | 0.80 (0.51, 1.25) | 16                  | 23        | 0.83 (0.43, 1.61) | 20                      | 26        | 0.69 (0.33, 1.46) | 16                  | 17        | 1.21 (0.58, 2.51) |
| <b>Q3</b>                             | 46                     | 54        | 1.07 (0.70, 1.63) | 19                  | 21        | 1.17 (0.63, 2.19) | 21                      | 26        | 0.92 (0.44, 1.92) | 12                  | 14        | 1.39 (0.60, 3.20) |
| <b>Q4</b> (highest inflammation)      | 52                     | 62        | 0.98 (0.63, 1.51) | 24                  | 30        | 1.24 (0.67, 2.32) | 25                      | 29        | 0.66 (0.34, 1.30) | 11                  | 11        | 3.54 (1.37, 9.14) |
|                                       | <b>P-trend</b> 0.75    |           |                   | <b>P-trend</b> 0.32 |           |                   | <b>P-trend</b> 0.38     |           |                   | <b>P-trend</b> 0.01 |           |                   |
| <b>All-cause mortality</b>            |                        |           |                   |                     |           |                   |                         |           |                   |                     |           |                   |
| <b>Continuous</b>                     | 211                    | 225       | 0.97 (0.89, 1.06) | 101                 | 112       | 1.12 (0.94, 1.35) | 97                      | 99        | 0.91 (0.81, 1.03) | 62                  | 62        | 1.19 (0.95, 1.50) |
| <b>Q1</b> (lowest inflammation)       | 53                     | 58        | Ref               | 33                  | 38        | Ref               | 18                      | 18        | Ref               | 20                  | 20        | Ref               |
| <b>Q2</b>                             | 47                     | 51        | 0.86 (0.57, 1.29) | 20                  | 23        | 0.86 (0.47, 1.56) | 26                      | 26        | 0.80 (0.40, 1.60) | 17                  | 17        | 1.28 (0.63, 2.62) |
| <b>Q3</b>                             | 52                     | 54        | 1.07 (0.72, 1.59) | 20                  | 21        | 1.07 (0.60, 1.92) | 25                      | 26        | 0.99 (0.50, 1.99) | 14                  | 14        | 1.44 (0.64, 3.25) |
| <b>Q4</b> (highest inflammation)      | 59                     | 62        | 0.94 (0.63, 1.41) | 28                  | 30        | 1.24 (0.70, 2.19) | 28                      | 29        | 0.65 (0.34, 1.24) | 11                  | 11        | 3.37 (1.33, 8.57) |
|                                       | <b>P-trend</b> 0.95    |           |                   | <b>P-trend</b> 0.35 |           |                   | <b>P-trend</b> 0.29     |           |                   | <b>P-trend</b> 0.02 |           |                   |

Abbreviations: BMI = Body Mass Index; CI = Confidence Interval; HR = Hazard Ratio; mdNLR = Methylation-Derived Neutrophil-to-Lymphocyte Ratio; NSCLC = Non-Small Cell Lung Cancer; NOS = Not Otherwise Specified; SCLC = Small Cell Lung Cancer

<sup>a</sup>Mortality was estimated using Cox proportional hazards models adjusted for age, sex, smoking status, pack years at blood draw, and time between blood draw and diagnosis; stage (early (I/II), late (III/IV), unknown) is included as a strata variable

<sup>b</sup>"All NSCLC" includes adenocarcinoma, squamous cell, and 16 cases with histotype NSCLC, NOS

**Supplementary Table 3. Participating CARET Institutions and Federalwide Assurance Numbers by Study Center**

| <b>Study center</b> | <b>Institution(s)</b>                                                                                                                                                         | <b>Federalwide Assurance Number (FWA)</b> |
|---------------------|-------------------------------------------------------------------------------------------------------------------------------------------------------------------------------|-------------------------------------------|
| Seattle             | Fred Hutchinson Cancer Research Center, Seattle, Washington                                                                                                                   | 1920                                      |
|                     | University of Washington, Seattle, Washington                                                                                                                                 | 6878                                      |
| Baltimore           | University of Maryland, Baltimore, Maryland                                                                                                                                   | 7145                                      |
| Portland            | Kaiser Foundation Research Institute on behalf of Kaiser Foundation Hospitals<br>(Kaiser Permanente Center for Health Research, Portland, Oregon was the CARET-specific site) | 2344                                      |
| New Haven           | Yale University, New Haven, Connecticut                                                                                                                                       | 2571                                      |
|                     | Lawrence & Memorial Hospital, New London, Connecticut                                                                                                                         | 3097                                      |
| San Francisco       | University of California, San Francisco, California                                                                                                                           | 68                                        |
| Irvine              | University of California, Irvine, California                                                                                                                                  | 4071                                      |
